# Supplementary material
Source: PubMed Central journal article supplement (PMC5399808)
Supplement: iahb_a_1224386_sm1602.pdf [file iahb_a_1224386_sm1602.pdf]

SUPPLEMENTARY TABLES

**Table S1: Correlation coefficients between socioeconomic status, ethnicity, and the various fitness tests.**

|                 | SES    | Ethnicity | SaR    | SJ     | SU     | SR <sup>a</sup> | BT   |
|-----------------|--------|-----------|--------|--------|--------|-----------------|------|
| SES             | 1.00   |           |        |        |        |                 |      |
| Ethnicity       | +0.68* | 1.00      |        |        |        |                 |      |
| SaR             | +0.01  | +0.07*    | 1.00   |        |        |                 |      |
| SJ              | +0.35* | +0.40*    | +0.22* | 1.00   |        |                 |      |
| SU              | +0.24* | +0.28*    | +0.09* | +0.39* | 1.00   |                 |      |
| SR <sup>a</sup> | +0.24* | +0.32*    | +0.16* | +0.43* | +0.27* | 1.00            |      |
| BT              | -0.01  | +0.06     | +0.09* | +0.29* | +0.19* | -0.23*          | 1.00 |

SaR = sit-and-reach, SJ = standing long jump, SU = sit-up, SR = shuttle run, BT = cricket ball throw, SES = Socioeconomic status, significant differences ( $p < 0.05$  with a Bonferroni correction) indicated with a \*

<sup>a</sup> Sign reversed as a higher score in shuttle run indicates poorer performance

**Table S2: P-values for each fitness test, for interactions between nutritional status, and socioeconomic status or ethnicity.**

|                                            | <b>Sit-and-reach</b> | <b>Standing jump</b> | <b>Sit-ups</b> | <b>Shuttle run</b> | <b>Ball throw</b> |
|--------------------------------------------|----------------------|----------------------|----------------|--------------------|-------------------|
| <b>Overweight/obese x SES</b>              | 0.41                 | <0.001*              | 0.07           | 0.07               | 0.20              |
| <b>Stunted x SES</b>                       | 0.43                 | 0.88                 | 0.64           | 0.46               | 0.60              |
| <b>Wasted x SES</b>                        | 0.22                 | 0.005                | 0.07           | 0.36               | 0.39              |
| <b>Stunted and wasted x SES</b>            | 0.65                 | 0.40                 | 0.81           | 0.46               | 0.66              |
| <b>Underweight<sup>a</sup> x SES</b>       | 0.05                 | 0.03                 | 0.03           | 0.06               | 0.08              |
|                                            |                      |                      |                |                    |                   |
| <b>Overweight/obese x Ethnicity</b>        | 0.01                 | <0.001*              | 0.56           | 0.04               | 0.02              |
| <b>Stunted x Ethnicity</b>                 | 0.21                 | 0.40                 | 0.02           | 0.31               | 0.76              |
| <b>Wasted x Ethnicity</b>                  | <0.001*              | <0.001*              | 0.01           | 0.91               | 0.15              |
| <b>Stunted and wasted x Ethnicity</b>      | 0.70                 | 0.72                 | 0.46           | 0.34               | 0.77              |
| <b>Underweight<sup>a</sup> x Ethnicity</b> | <0.001*              | <0.001*              | 0.20           | 0.41               | 0.19              |

SES = Socioeconomic status, significant differences ( $p < 0.05$  with a Bonferroni correction ie. 50 tests therefore  $p < 0.001$ )

indicated with a \*

<sup>a</sup> Restricted to 6-9 year olds

**Table S3: R<sup>2</sup> values for various regression models for each fitness test and nutritional status group.**

|                                         | <b>Sit-and-reach</b> | <b>Standing jump</b> | <b>Sit-ups</b> | <b>Shuttle run</b> | <b>Ball throw</b> |
|-----------------------------------------|----------------------|----------------------|----------------|--------------------|-------------------|
| <b>Minimally adjusted<sup>a</sup></b>   |                      |                      |                |                    |                   |
| <b>Overweight/obese</b>                 | 0.04                 | 0.40                 | 0.28           | 0.20               | 0.58              |
| <b>Stunted</b>                          | 0.04                 | 0.42                 | 0.29           | 0.22               | 0.58              |
| <b>Wasted</b>                           | 0.04                 | 0.40                 | 0.28           | 0.20               | 0.58              |
| <b>Stunted and wasted</b>               | 0.04                 | 0.41                 | 0.28           | 0.20               | 0.58              |
| <b>Underweight<sup>b</sup></b>          | 0.04                 | 0.27                 | 0.23           | 0.14               | 0.42              |
| <b>Fully adjusted<sup>c</sup></b>       |                      |                      |                |                    |                   |
| <b>Overweight/obese</b>                 | 0.06                 | 0.52                 | 0.36           | 0.31               | 0.58              |
| <b>Stunted</b>                          | 0.06                 | 0.54                 | 0.37           | 0.33               | 0.58              |
| <b>Wasted</b>                           | 0.06                 | 0.53                 | 0.37           | 0.33               | 0.59              |
| <b>Stunted and wasted</b>               | 0.06                 | 0.53                 | 0.37           | 0.32               | 0.59              |
| <b>Underweight<sup>b</sup></b>          | 0.05                 | 0.42                 | 0.34           | 0.25               | 0.44              |
| <b>Model using z-scores<sup>d</sup></b> |                      |                      |                |                    |                   |
| <b>Overweight/obese</b>                 | 0.02                 | 0.21                 | 0.12           | 0.15               | 0.01              |
| <b>Stunted</b>                          | 0.03                 | 0.24                 | 0.12           | 0.16               | 0.03              |
| <b>Wasted</b>                           | 0.03                 | 0.21                 | 0.11           | 0.15               | 0.02              |
| <b>Stunted and wasted</b>               | 0.03                 | 0.21                 | 0.11           | 0.15               | 0.01              |
| <b>Underweight<sup>b</sup></b>          | 0.02                 | 0.23                 | 0.16           | 0.14               | 0.04              |

<sup>a</sup> Model using actual fitness test scores adjusted for age, gender, and school cluster

<sup>c</sup> Restricted to 6-9 year olds

<sup>b</sup> Model using actual fitness test scores adjusted for age, gender, school cluster, socioeconomic status and ethnicity

<sup>d</sup> Model using z-score fitness test scores (which adjust for age and gender), adjusting for school cluster, socioeconomic status and ethnicity
